# Supplementary material
Source: PubMed Central journal article supplement (PMC3040665)
Supplement: pgen.1001312.s012.pdf [file pgen.1001312.s012.pdf]

Table S4

**A)**

| gene                   | primers (5' → 3')        |                          |
|------------------------|--------------------------|--------------------------|
| ACA8<br>(AT5G57110)    | GATACTCTTTTAGGACTAACAGAA | CTTTACCAGTAATGATTCGAAAGG |
| AT2G41230              | CAGGAGCAGATTAAGGGCTTT    | TGACATGAAGGCTTCTACTGC    |
| AT2G47180              | ATCTGAAGCCGTTTCATCACC    | ACATGTCAACGTCCAAAGCA     |
| AT1G02850              | TTTGGTGGGTACGAGAGGAG     | GGTTTGCATTTCCGACAAC      |
| MOL1<br>(AT5G51350)    | ATGCCGGTGGATTGATGATA     | GGACGGTCAGACTGGTCACT     |
| PXY/TDR<br>(AT5G61480) | CCGGTTCGTACGGTTACATT     | ACGACCTACCCATGCTTTTG     |
| RTE<br>(AT2G26070)     | TCAAACACACCGACTTTGGA     | CATTGAGCCACCATAGCAAA     |
| RUL1<br>(AT5G05160)    | CCATTGGCTACAATGCTCCT     | GAACCCATCTCGGAAGATCA     |
| SCM<br>(AT1G11130)     | CCGGTTGTTCACCAGAATTT     | GCCTTGCTCTGTCAAATGGT     |
| AT5G54690              | CCGACAATTGCCAAAAACTT     | ATGCCAGAACGGATCTATGG     |
| WOX4<br>(AT1G46480)    | TGGTGGAGAAGGAGGAGT       | TCATGACTTCATCTCCCTTCAGGA |

**B)**

|                        |                                |                                 |
|------------------------|--------------------------------|---------------------------------|
| GUS                    | ACTACCATGGCGTTACGTCTGTAGAAACCC | ACTACTGCAGTCATTGTTTGCCTCCCTGCTG |
| RUL1<br>(AT5G05160)    | TGATATTCTCTCACTCCCTTCTC        | CTGGATCTTGAACTCCGCTCCCG         |
| PXY/TDR<br>(AT5G61480) | TTCCCTCGACCTCTCTCAC            | CCGTTCTCTTTGTTTTTTCCCC          |
| AGO4<br>(AT2G27040)    | CATTACCACCTCCTCCACC            | CTCTCTTGGGGTTTCTGTCT            |
| ATHB8<br>(AT4G32880)   | TCACTCTTCTTGTGAACTCCTCTC       | TACCGGAGATAAGGCCTTGA            |
| MOL1<br>(AT5G51350)    | TTGTTGTTCTTGGTCTGGTGT          | ATATGCGGTGGAAGTTTGC             |
| RTE<br>(AT2G26070)     | ATAAACAACCAAAGTTTCATTGTACC     | TCCAATATGACCAATGAAAGGAGCC       |
| AT5G57130              | ATGGCAAAGCTAGAGAGAGG           | GCTTTTATGTTTCAGGTCGAGG          |
| AT2G41070              | CTCCTTTCTCTCTTTTTCTCGATCT      | AGGCGCTTGTGGTGTATC              |
| WOX4<br>(AT1G46480)    | CGAGAAAGGCATGCATAGCATT         | TCATGACTTCATCTCCCTTCAGGA        |

**Table S4:** Primers used for performing qRT-PCR **(A)** and generating RNA probes **(B)**.
